# Supplementary material for: Towards FAIRification of sensitive and fragmented rare disease patient data: challenges and solutions in European reference network registries
Source: Orphanet J Rare Dis. 2022 Dec 14;17:436. doi: 10.1186/s13023-022-02558-5 (PMC9749345; doi:10.1186/s13023-022-02558-5)
Supplement: Supplementary file 1 — Additional file 1.. Template of implementation document. [file 13023_2022_2558_MOESM1_ESM.xlsx]

## Sheet: Implementations
	Note: If an ERN has a tool or standard that is not in the list, please add a new row and the tool name to the list		ERN 1	ERN 2	Drop down list	Remember to:
Phase	Function	Tool/ Standard name	Registry 1.A	Registry 2.A	Implemented	Describe implementation in a new tab Methods
1 Modelling	Data Model	CDE Semantic Model			Plans to implement	Describe plan in tab methods
1 Modelling	Set of data elements	Common Data Elements JRC			Needs expert help (see methods)	Describe request in tab Methods
1 Modelling	Genes ontology	HGNC			Implementing assisted by expert	Describe status in tab Methods
1 Modelling	Variant Ontology	HGVS			Non applicable
1 Modelling	Phenotype ontology	HPO
1 Modelling	Catalogue of somatic mutations in cancer	COSMIC
1 Modelling	Mendelian Inheritance Ontology	OMIM
1 Modelling	Genes ontology	HUGO
1 Modelling	Systematized Nomenclature of Medicine Clinical Terms	SNOMED CT
1 Modelling	International Classification of Diseases	ICD-10
1 Modelling	International Classification of Diseases	ICD-11
1 Modelling	eagle-i resource ontology	ERO
1 Modelling	Minimum Information About BIobank data Sharing	MIABIS
1 Modelling	National Cancer Institute Theasaurus	NCIT
1 Modelling	Anatomical Therapeutic Chemical Classification	ATC
1 Modelling	Genotype ontology	GENO (for allelic state)
1 Modelling	International Classification of Diseases for Oncology	ICDO
1 Modelling	Code system for medicaments	ATC
1 Modelling	Disease concept ontology	ORDO
1 Modelling	International Classification of Childhood Cancer	ICCC 3
1 Modelling	International Classification of Pediatric Endocrine Diagnoses	ICPED
1 Modelling	Logical Observation Identifiers Names and Codes	LOINC
2_Building the registry and collecting data	Interoperable Case Report Form	iCRF Generator
2_Building the registry and collecting data	Data Source (EHR/EMR)	DataRiver MyHealth eCRF
2_Building the registry and collecting data	Data Source (EHR/EMR)	Epic EHR
2_Building the registry and collecting data	Data Source (EHR/EMR)	Nexuzhealth
2_Building the registry and collecting data	Data Source (EHR/EMR)	AllScripts
2_Building the registry and collecting data	Data Source (EHR/EMR)	MEDOC
2_Building the registry and collecting data	Data Source (EHR/EMR)	MEONA
2_Building the registry and collecting data	Data Source (EHR/EMR)	HiX (ChipSoft)
2_Building the registry and collecting data	Data Source (EHR/EMR)	CERNER
2_Building the registry and collecting data	Data Source (EHR/EMR)	Documentum Opentext
2_Building the registry and collecting data	Data Source (EHR/EMR)	Trakcare
2_Building the registry and collecting data	Data Source (EHR/EMR)	i.s.h.med
2_Building the registry and collecting data	Data Source (EHR/EMR)	Clinical Portal
2_Building the registry and collecting data	Data Source (EHR/EMR)	Takecare
2_Building the registry and collecting data	Data Source (EHR/EMR)	Own System
2_Building the registry and collecting data	Data Source (EHR/EMR)	Not use any system (manual)
2_Building the registry and collecting data	Data Collection	Castor EDC
2_Building the registry and collecting data	Data Collection	Cleanweb
2_Building the registry and collecting data	Data Collection	DataRiver MyHealth eCRF
2_Building the registry and collecting data	Data Collection	OSSE
2_Building the registry and collecting data	Data Collection	Marvin (XClinical)
2_Building the registry and collecting data	Data Collection	Molgenis
2_Building the registry and collecting data	Data Collection	RedCap
2_Building the registry and collecting data	Data Collection	Own System
2_Building the registry and collecting data	Pseudonymisation	EUPID
3_Registering the registry	Registry directory	ERDRI.dor
3_Registering the registry	Metadata repository	ERDRI.mdr
4_Making data accessible for querying	Metadata Model	EJPRD Metadata Model
4_Making data accessible for querying	Metadata Model	DCAT
4_Making data accessible for querying		MOLGENIS metadata structure
4_Making data accessible for querying		Metadata standards
4_Making data accessible for querying		RDFS
4_Making data accessible for querying		DC terms
4_Making data accessible for querying	Consent Machine Readable	ADA-M
4_Making data accessible for querying	Query	Beacon-2 schema
4_Making data accessible for querying	Data Use Ontology	DUO
4_Making data accessible for querying	Informed Consent Ontology	ICO
4_Making data accessible for querying	FAIR Data Point	Castor FDP
4_Making data accessible for querying	FAIR Data Point	FAIR Data Point
4_Making data accessible for querying	FAIR Data Point	MOLGENIS FDP
4_Making data accessible for querying	Serialization Format	JSON LD
4_Making data accessible for querying	Serialization Format	Turtle
4_Making data accessible for querying	Serialization Format	N-Triples
4_Making data accessible for querying	Serialization Format	N-Quads
4_Making data accessible for querying	Serialization Format	CSV
4_Making data accessible for querying	Serialization Format	Excel Reports
4_Making data accessible for querying	Serialization Format	RDF/XML
4_Making data accessible for querying	Phenotypic information standard representation format	Phenopackets
4_Making data accessible for querying	RDF Mapping Language	RML
5_Querying the data	Query tool	Beacon-2 API
5_Querying the data	Query tool	RD-NEXUS
5_Querying the data	RDF Querying Language	SPARQL
5_Querying the data	Lookup collaboration for candidate genes in a registry	PaR-RaDiGM
5_Querying the data	Query tool	API TOKEN REDCAP
