# Supplementary material for: Towards FAIRification of sensitive and fragmented rare disease patient data: challenges and solutions in European reference network registries
Source: Orphanet J Rare Dis. 2022 Dec 14;17:436. doi: 10.1186/s13023-022-02558-5 (PMC9749345; doi:10.1186/s13023-022-02558-5)
Supplement: Supplementary file 2 — Additional file 2.. Complete challenge-solution matrix. [file 13023_2022_2558_MOESM2_ESM.xlsx]

## Sheet: complete table for suplementar
NB: Repeated original challenges were collected by the same steward, hence each line represents a different ERN.
Category of Challenges	Original Challenges	Common Topic	Original Challenges Count per Topic	Curated Challenges		Category of Solutions	Specific Solution	Peer ERNs	EJP RD	JRC	Developers
community	Disability joint ERNs FAIRification	Disability Questionnaire	1	How other ERNs annotate disability questionnaire?		Survey and report on a topic	Disability Survey	x
community	It would be a great learning exercise if we can learn from advanced registries. Examples can help to better understand those stuff.	Experience about FAIR	1	Exchange of experiences between ERNs registries		Arrange exchange meetings	Exchange of FAIR experience	x
community	Share ERN tools/standards overview	Used tools and standards	1	What tools and standards do other ERNs use?		Arrange exchange meetings	Exchange of FAIR experience	x
community	It would be a great learning exercise if we can learn from advanced registries. Examples can help to better understand those stuff.	Learn by Examples about FAIR	2	Learn from advanced registries with examples		Share information	Exchange of information on a regular basis
community	Learn from advanced registries							x
community	Learn from others to overcome datasharing issues	Data Sharing	1	How do other ERNs share data?		Share information	Exchange of information on a regular basis	x
community	How other ERNs collect information from the two data elements (6.1 Diagnosis and 6.2 Genetic Diagnosis).	Common Data Elements (CDEs)	2	How do other ERNs collect the following CDEs: 2.1 Date of Birth, 6.1 Diagnosis and 6.2 Genetic Diagnosis?		Share information	Share data dictionaries for identifying DCDEs
community	Wonder how other ERNs implement JRC CDEs, especially "date of birth"							x	x	x
community	Share the database templates other ERNs	Database Template	1	What database templates do other ERNs use?		Share information	Share data dictionaries for identifying DCDEs	x	x	x
Implementation	iCRF generator demo hands on	iCRF	1	How can I use the iCRF generator tool?		Get implementation support from relevant experts	Experts from the CDE Modelling group for data conversion		x
Implementation	need hands on to implement the CDE semantic model in RedCAP	CDE Model	6	How to implement the CDE model in different EDC systems?		Get implementation support from relevant experts	Experts from the CDE Modelling group for data conversion		x
Implementation	They need expert help to implement CDE Semantic Model
Implementation	Need help to implement the CDE semantic model. How to implement them with an exiting relation model?
Implementation	needs help on how to implement semantic model in Marvin Xclinical
Implementation	make a mapping between all 4 ERNs to the semantic model. Need a BYOD for mapping, with CDE EJP-RD group. Or do it locally and get it reviewed by experts. Find out if differences are solvable with semantic reasoning or not.
Implementation	Needs guidance on how to implement CDE Elements: - What are the specifications for missing values?
Implementation	JSON LD on the shortlist. need recommendations from EJP on what is most accessible and used, and what is the most maintainable and achievable. curious to learn about what other ERNs did. Used in the past, and discontinued it because there was no use of the API. Needs EJP ERN wide approach. What is the preference for the EJP Virtual Platform?	Data Format	11	Advice on data representation languages		Get implementation support from relevant experts	Experts from the CDE Modelling group for data conversion		x
Implementation	JSON LD on the shortlist. need recommendations from EJP on what is most accessible and used, and what is the most maintainable and achievable. curious to learn about what other ERNs did. Used in the past, and discontinued it because there was no use of the API. Needs EJP ERN wide approach. What is the preference for the EJP Virtual Platform?
Implementation	JSON LD on the shortlist. need recommendations from EJP on what is most accessible and used, and what is the most maintainable and achievable. curious to learn about what other ERNs did. Used in the past, and discontinued it because there was no use of the API. Needs EJP ERN wide approach. What is the preference for the EJP Virtual Platform?
Implementation	JSON LD on the shortlist. need recommendations from EJP on what is most accessible and used, and what is the most maintainable and achievable. curious to learn about what other ERNs did. Used in the past, and discontinued it because there was no use of the API. Needs EJP ERN wide approach. What is the preference for the EJP Virtual Platform?
Implementation	JSON LD on the shortlist. need recommendations from EJP on what is most accessible and used, and what is the most maintainable and achievable. curious to learn about what other ERNs did. Used in the past, and discontinued it because there was no use of the API. Needs EJP ERN wide approach. What is the preference for the EJP Virtual Platform?
Implementation	data serialization format. Need help deciding what would be the best format for data serialization.
Implementation	data serialization format. Need help deciding what would be the best format for data serialization.
Implementation	data serialization format. Need help deciding what would be the best format for data serialization.
Implementation	data serialization format. Need help deciding what would be the best format for data serialization.
Implementation	data serialization format. Need help deciding what would be the best format for data serialization.
Implementation	Minimal interoperability: Request guidance on what are the data representation language they should use								x
Implementation	needs DEMO for transforming SQL database into RDF, building a RDF transformation tool in their data collection system.	Data Transformation	1	How to create RDF triples from a SQL database?		Get implementation support from relevant experts	Experts from the CDE Modelling group for data conversion		x
Implementation	FAIR data point Redcap. Although they're in touch with other projects implementing FDP, will need EJP help for implementing FAIR data point in RedCap	FAIR Data Point	1	How to integrate FDP in a registry?		Get implementation support from relevant experts	Experts from the CDE Modelling group for data conversion		x
Implementation	MERITA registry considers offering an Excel import function. Yet they are awaiting for knowing whether a common template would be made available	Excel Template for CDEs	1	Is there a common template for excel import/exports (of the CDEs?)?		Get implementation support from relevant experts	Experts from the CDE Modelling group for data conversion		x
Implementation	would like erdri.mdr import template	Registration of Registries	1	Is there a template for batch import of metadata elements into ERDRI.MDR?		Get implementation support from relevant experts	Experts from the EU RD Platform for findability of registries			x
Implementation	They need expert help to implement EJPRD Metadata Model	EJP RD Metadata Model	3	How can the EJPRD metadata model be implemented?		Get implementation support from relevant experts	Experts from the Metadata Modelling group for metadata conversion		x
Implementation	They need expert help to implement EJPRD Metadata Model
Implementation	They need expert help to implement EJPRD Metadata Model
Implementation	need help to implement the Query Tool	Query	1	How can the query builder tool be implemented on my system?		Get implementation support from relevant experts	Experts from the Query Builder group for data querying		x
Legal	machine-readable consent. Needs more information on the practical implementation and usability of ADA-M, ICO, DUO, DUC. Trying to use all the mentioned resources to make a profile of our Informed Consent forms. Need help to choose the terms and build the profile	Machine-readability of Informed Consent	1	How can machine-readable information consent be modelled?		Develop generic consent form	EJP RD Consent Template		x
Legal	Are ERNs allowed to use their own consent form?	Recommendation of Informed Consent	1	Which consent form should be used?		Develop generic consent form	EJP RD Consent Template		x
Legal	How other ERNs are dealing with different data processing policies among databases.	Data Processing Agreements	3	European level guidance on: Data Processing Agreements per database and countries; Agreements between EDC software and Hospitals that include multiple ERNs; ERNs Consortium agreement; Legal issues between countries		Reach data processing agreements and data sharing policies	ERICA project	x	x
Legal	What are the legal aspects of data sharing, specifically those of software providers (data consumers) and hospitals/institutes (data producers). ERNs are not legal entities, so difficult. Perhaps software providers should make deal directly with hospital, which cover 1 or more ERNs. Also, should ERN have consortium agreement for all parties involved? Is there any guidance from Brussels?
Legal	Legal issues difference between countries
Legal	Random number from the hospital when the patient get in. They use their own pseudonymization. Is this allowed? What are the implications of not using EUPID?	Implementation of Pseudonymisation Tool	11	How to implement EUPID within a registry?		Get implementation support from experts who develop pseudonimisation tool	Experts from the pseudonymisation tool group				x
Legal	EUPID match: how can we see the "similar name" patient that is already registered. how do i know which patient it is similar to?
Legal	Need EUPID specifications. have 250 patients, need bash implementation or automated.
Legal	They think it will be difficult and much effort to implement EUPIDs in existing registries as they need to go through all patients and assign IDs. In the future, applying EUPIDS to a small registry (or the registry of registries) is possible after knowing more about EUPIDS.
Legal	EUPID specifications are too vague for implementation, according to the MERITA registry developer. An alternative should be proposed asap given the central role of patient ids in the development.
Legal	EUPID is an aditional level of pseudonymization. Help implementing EUPID. Functional and technical concerns.
Legal	EUPID is an aditional level of pseudonymization. Help implementing EUPID. Functional and technical concerns.
Legal	EUPID is an aditional level of pseudonymization. Help implementing EUPID. Functional and technical concerns.
Legal	EUPID is an aditional level of pseudonymization. Help implementing EUPID. Functional and technical concerns.
Legal	Legal questions about policy and licenses issues. Need information from experts, if they can clarify how local registries use EUPIDS, so that they can generate pseudonyms and then provide them to the European registries. The flow of data information should be discussed and clarified.
Legal	Currently do not use EUPID, but since we use Castor for the registry and a EUPID implementation within Castor seems to be on their development roadmap we could use this solution in the future.
Legal	EUPID Legal advice.	Legal Concerns of Psedonymisation Tool	4	What are the legal concerns about the EUPID implementation?			Experts from the pseudonymisation tool group
Legal	EUPID Legal advice.
Legal	EUPID Legal advice.
Legal	EUPID Legal advice.					Get implementation support from experts who develop pseudonimisation tool					x
Modelling	plan to collect treatment info, ATC ontology is not free, need alternative. would like a table with free ontologies options	Recommendation of Ontology	4	Which ontology is recommended for [X]?		Organise modelling groups	CDE Modelling group		x
Modelling	For 6.2, which ontology (HVGS, HGNC, OMIN) should ERN choose?
Modelling	CRANIO wants to know which genetic notation system to use. Specifically, they are looking to align with ITHACA.
Modelling	(wish to add specific variants and they use COSMIC cancer related genes list) and clinical diagnose (Genturis only wants ORDO) is that ok?
Modelling	Is 7.2 "Consent to the reuse of data" mandatory? We think it is not applicable in our ERN, which is based on DICA audit system	Non-applicable CDEs	3	Are non-applicable CDEs mandatory?		Get modelling advice from relevant experts	Experts from the JRC for Common Data Elements			x
Modelling	Are all Common Data Elements mandatory? Some elements are not applicable to rare cardiac diseases.
Modelling	Needs guidance on how to implement CDE Elements: - Are all concepts mandatory?
Modelling	JRC states date of birth, but is too identifiable, so GENTURIS prefer to collect year of birth. Is it allowed to collect and share complete date of birth?	Inconsistency of data with CDEs	3	What if collected data do not follow the formats required in CDEs?			Experts from the JRC for Common Data Elements
Modelling	Only have year of birth the rest of the date is not applicable. Is this allowed?
Modelling	The data element captured by REDCap (the used EDC system) is not consistent with JRC CDE, for example by "age" instead of "date of birth";					Get modelling advice from relevant experts				x
Modelling	Some elements (e.g., biobanks, biological samples, and its variability) are not (clearly) defined.	Poorly-defined CDEs	1	What if the CDE [X] is not well-defined?		Get modelling advice from relevant experts	Experts from the JRC for Common Data Elements			x
Modelling	The Orphanet is not updated (or at least not ready) for rare cardiac diseases yet.	Insufficiency of Ontology	1	What if Orphacode is not sufficient for [X] diseases?		Get modelling advice from relevant experts	Experts from the Orphanet group for Orphacode		x
Training	needs more information on ERDRI.mdr utility / added value	ERDRI	4	More information on ERDRI (added value, utility)		Organise training activities	"Coffee rounds" (ERDRI, Orphacodes, EUPID, Pratical requirements, Pratical implementation, Resource finder, Informed Consent, Disability and QoL)		x	x
Training	needs more information on ERDRI.mdr utility / added value
Training	needs more information on ERDRI.mdr utility / added value
Training	needs more information on ERDRI.mdr utility / added value
Training	From practical perspective, are there any technical specifications for CDE?	Common Data Elements (CDEs)	1	Documentation and specification of CDEs		Provide guidelines	Documentation of Semantic CDE Model		x
Training	CDE model, need more information: what is it addressed for, what is the added value, what would be effort?	CDE Model	1	More information on CDE model (e.g. what is does, what is the added value, what would be the effort to implement it)		Provide guidelines	Documentation of Semantic CDE Model		x
Training	considering ADA-M, but not planned yet. for now consent is at HCP level with tick boxes.	Informed Consent	4	More information on ADA-M and machine readable consent		Organise training activities	ERN Technical Workshops (Semantic CDE Model, EJP RD Metadata Model, EUPID API, Data formats and mapping languages, Phenopackets, Query builder, Orphacodes, DCDEs, PROMs)		x		x
Training	considering ADA-M, but not planned yet. for now consent is at HCP level with tick boxes.
Training	considering ADA-M, but not planned yet. for now consent is at HCP level with tick boxes.
Training	considering ADA-M, but not planned yet. for now consent is at HCP level with tick boxes.
Training	would like to implement Beacon 2, but depends on added value. If EJP could demonstrate how useful this is, would be easier.	Beacon	4	More information on Beacon 2.0 (added value, utility, how to implement it)			ERN Technical Workshops (Semantic CDE Model, EJP RD Metadata Model, EUPID API, Data formats and mapping languages, Phenopackets, Query builder, Orphacodes, DCDEs, PROMs)
Training	would like to implement Beacon 2, but depends on added value. If EJP could demonstrate how useful this is, would be easier.
Training	would like to implement Beacon 2, but depends on added value. If EJP could demonstrate how useful this is, would be easier.
Training	would like to implement Beacon 2, but depends on added value. If EJP could demonstrate how useful this is, would be easier.					Organise training activities			x		x
Training	Metadata model: We need more information: what is it addressed for, what is the added value?	EJP RD Metadata Model	1	More information on EJP-RD Metadata Model (what it does, what is the added value)		Organise training activities	ERN Technical Workshops (Semantic CDE Model, EJP RD Metadata Model, EUPID API, Data formats and mapping languages, Phenopackets, Query builder, Orphacodes, DCDEs, PROMs)		x		x
Training	EUPID: has any costs? Licenses are required at HCP or ERN level?	Pseudonymisation Tool	1	More information on EUPID (e.g. licenses, costs)		Organise training activities	ERN Technical Workshops (Semantic CDE Model, EJP RD Metadata Model, EUPID API, Data formats and mapping languages, Phenopackets, Query builder, Orphacodes, DCDEs, PROMs)		x		x
Training	how FDP would actually work?	FAIR Data Point (FDP)	4	More information on FAIR Data Point (how will it work)			ERN Technical Workshops (Semantic CDE Model, EJP RD Metadata Model, EUPID API, Data formats and mapping languages, Phenopackets, Query builder, Orphacodes, DCDEs, PROMs)
Training	how FDP would actually work?
Training	how FDP would actually work?
Training	how FDP would actually work?					Organise training activities			x		x
Training	what is the use of phenopackets for the registry?	Phenopackets	4	More information on Phenopackets (utility)			ERN Technical Workshops (Semantic CDE Model, EJP RD Metadata Model, EUPID API, Data formats and mapping languages, Phenopackets, Query builder, Orphacodes, DCDEs, PROMs)
Training	what is the use of phenopackets for the registry?
Training	what is the use of phenopackets for the registry?
Training	what is the use of phenopackets for the registry?					Organise training activities			x		x
Training	They need to know more about "querying".	Concept of Query	1	More information on Querying		Organise training activities	ERN Technical Workshops (Semantic CDE Model, EJP RD Metadata Model, EUPID API, Data formats and mapping languages, Phenopackets, Query builder, Orphacodes, DCDEs, PROMs)		x		x
Training	RDF mapping language: We wonder how much effort is required and may need help to program it.	Mapping Language	1	More information on RDF Mapping Languages		Organise training activities	ERN Technical Workshops (Semantic CDE Model, EJP RD Metadata Model, EUPID API, Data formats and mapping languages, Phenopackets, Query builder, Orphacodes, DCDEs, PROMs)		x		x
Training	The ERN is planning to use the OMO-CMD model as common data elements. They want to know what would be the interoperability impact when using EJPR-RD CDE Model or OMOP-CMD.	Model Mapping	1	What interoperability impact difference would be between using CDE Model and OMOP-CMD?		Organise training activities	ERN Technical Workshops (Semantic CDE Model, EJP RD Metadata Model, EUPID API, Data formats and mapping languages, Phenopackets, Query builder, Orphacodes, DCDEs, PROMs)		x		x
Training	FAIR knowledge: They need to know more about FAIR, and FAIR-related tools/standards.	Expertise about FAIR	1	More information on FAIR		Organise training activities	Rome Summer School		x
Training	Minimal interoperability: Are there any diagrams, definitions, and technology specification for minimal interoperability?	Concept of Interoperability	2	Ground rules for interoperability (e.g., terminology, personnel, connectivity mechanism, API definition sets, diagrams, and technology specification)		Provide guidelines	Virtual Platform Specification (VIPS)
Training	Would be good if EJP-RD could define some ground rules for interoperability (e.g., terminology, personnel, connectivity mechanism, API definition sets, and so on)								x
Training	Metadata model: They need to know more about the EJP-RD Virtual Platform as well as the Metadata model to make the decision if they will use it.	EJP RD Virtual Platform	1	More information on EJP RD Virtual Platform		Provide guidelines	Virtual Platform Specification (VIPS)		x
